# Supplementary material for: The Proinflammatory Cytokines IL-18, IL-21, and IFN-γ Differentially Regulate Liver Inflammation and Anti-Mitochondrial Antibody Level in a Murine Model of Primary Biliary Cholangitis
Source: PubMed Central journal article supplement (PMC8922149; doi:10.1155/2022/7111445), 2022-03-07
Supplement: 7111445.f1.pdf [file 7111445.f1.pdf]

# Supplementary Figure 1

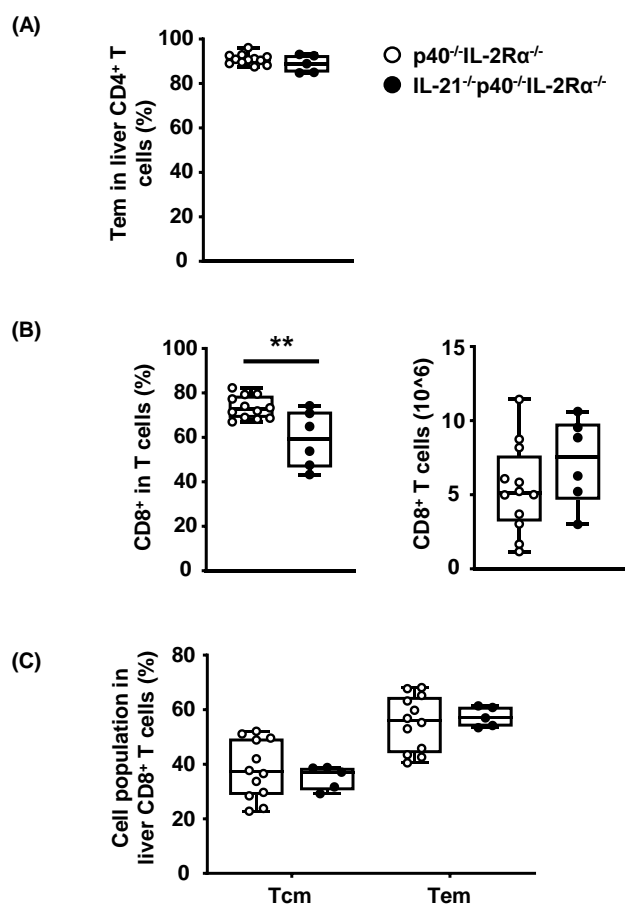

## Supplementary Figure 1. T cells infiltration and activation status in liver from IL-21<sup>-/-</sup>p40<sup>-/-</sup>IL-2Rα<sup>-/-</sup> mice

(A) Percentages of effector memory (Tem) CD4<sup>+</sup> T cells from IL-21<sup>-/-</sup>p40<sup>-/-</sup>IL-2Rα<sup>-/-</sup> (n=5) and p40<sup>-/-</sup>IL-2Rα<sup>-/-</sup> (n=12) mice. (B) Percentages and numbers of CD8<sup>+</sup> T cells in liver from IL-21<sup>-/-</sup>p40<sup>-/-</sup>IL-2Rα<sup>-/-</sup> (n=6) and p40<sup>-/-</sup>IL-2Rα<sup>-/-</sup> (n=12) mice. (C) Percentages of CD8<sup>+</sup> T central memory (Tcm) and effector memory (Tem) cells from IL-21<sup>-/-</sup>p40<sup>-/-</sup>IL-2Rα<sup>-/-</sup> (n=5) and p40<sup>-/-</sup>IL-2Rα<sup>-/-</sup> (n=12) mice. \*p < 0.05, \*\*p < 0.01, \*\*\*p < 0.001.
