# Supplementary material for: The Proinflammatory Cytokines IL-18, IL-21, and IFN-γ Differentially Regulate Liver Inflammation and Anti-Mitochondrial Antibody Level in a Murine Model of Primary Biliary Cholangitis
Source: PubMed Central journal article supplement (PMC8922149; doi:10.1155/2022/7111445), 2022-03-07
Supplement: 7111445.f2.pdf [file 7111445.f2.pdf]

# Supplementary Figure 2

(A) ○ p40<sup>-/-</sup>IL-2Rα<sup>-/-</sup> ● IFN-γ<sup>-/-</sup>p40<sup>-/-</sup>IL-2Rα<sup>-/-</sup>

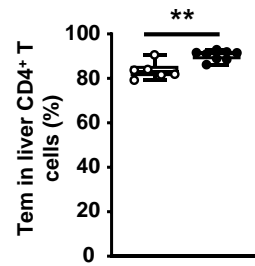

## Supplementary Figure 2. CD4<sup>+</sup> T cells activation status in liver from IFN-γ<sup>-/-</sup>p40<sup>-/-</sup>IL-2Rα<sup>-/-</sup> mice

(A) Percentages of effector memory (Tem) CD4<sup>+</sup> T cells from IFN-γ<sup>-/-</sup>p40<sup>-/-</sup>IL-2Rα<sup>-/-</sup> (n=8) and p40<sup>-/-</sup>IL-2Rα<sup>-/-</sup> (n=6) mice. \*p < 0.05, \*\*p < 0.01, \*\*\*p < 0.001.
