# Supplementary material for: The Proinflammatory Cytokines IL-18, IL-21, and IFN-γ Differentially Regulate Liver Inflammation and Anti-Mitochondrial Antibody Level in a Murine Model of Primary Biliary Cholangitis
Source: PubMed Central journal article supplement (PMC8922149; doi:10.1155/2022/7111445), 2022-03-07
Supplement: 7111445.f3.pdf [file 7111445.f3.pdf]

# Supplementary Figure 3

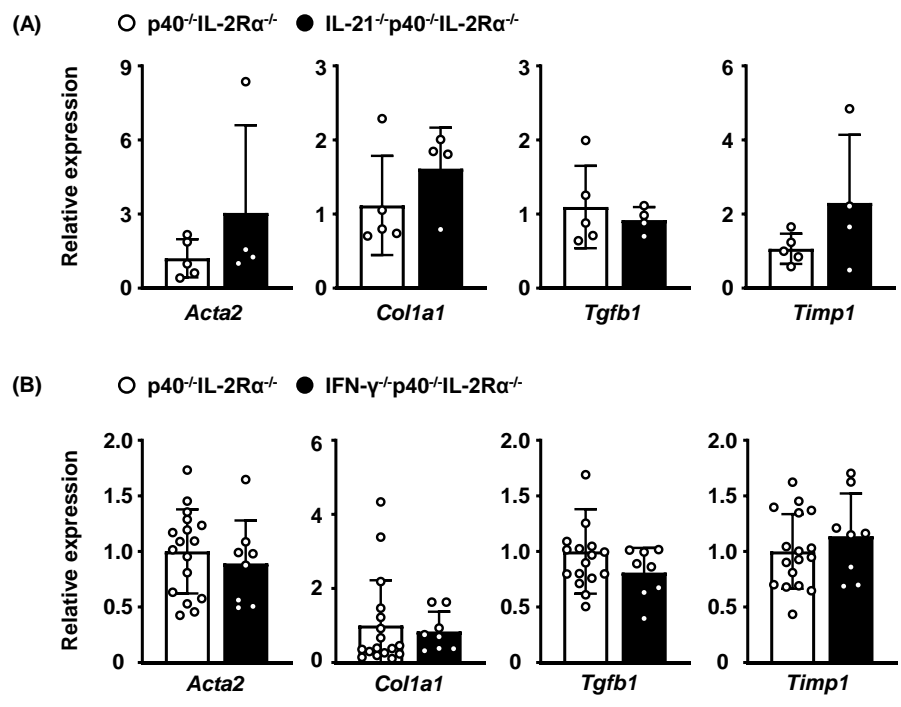

## Supplementary Figure 3. Liver fibrosis in $IL-21^{-/-}p40^{-/-}IL-2R\alpha^{-/-}$ mice and $IFN-\gamma^{-/-}p40^{-/-}IL-2R\alpha^{-/-}$ mice

**(A)** Quantitative real-time PCR analysis of *Acta2*, *Col1a1*, *Tgfb1* and *Timp1* mRNA levels in livers from  $IL-21^{-/-}p40^{-/-}IL-2R\alpha^{-/-}$  (n=4) and  $p40^{-/-}IL-2R\alpha^{-/-}$  (n=5) mice. **(B)** Quantitative real-time PCR analysis of *Acta2*, *Col1a1*, *Tgfb1* and *Timp1* mRNA levels in livers from  $IFN-\gamma^{-/-}p40^{-/-}IL-2R\alpha^{-/-}$  (n=8) and  $p40^{-/-}IL-2R\alpha^{-/-}$  (n=17) mice. \* $p < 0.05$ , \*\* $p < 0.01$ , \*\*\* $p < 0.001$ .
