# Supplementary material for: The Proinflammatory Cytokines IL-18, IL-21, and IFN-γ Differentially Regulate Liver Inflammation and Anti-Mitochondrial Antibody Level in a Murine Model of Primary Biliary Cholangitis
Source: PubMed Central journal article supplement (PMC8922149; doi:10.1155/2022/7111445), 2022-03-07
Supplement: 7111445.f4.pdf [file 7111445.f4.pdf]

# Supplementary Figure 4

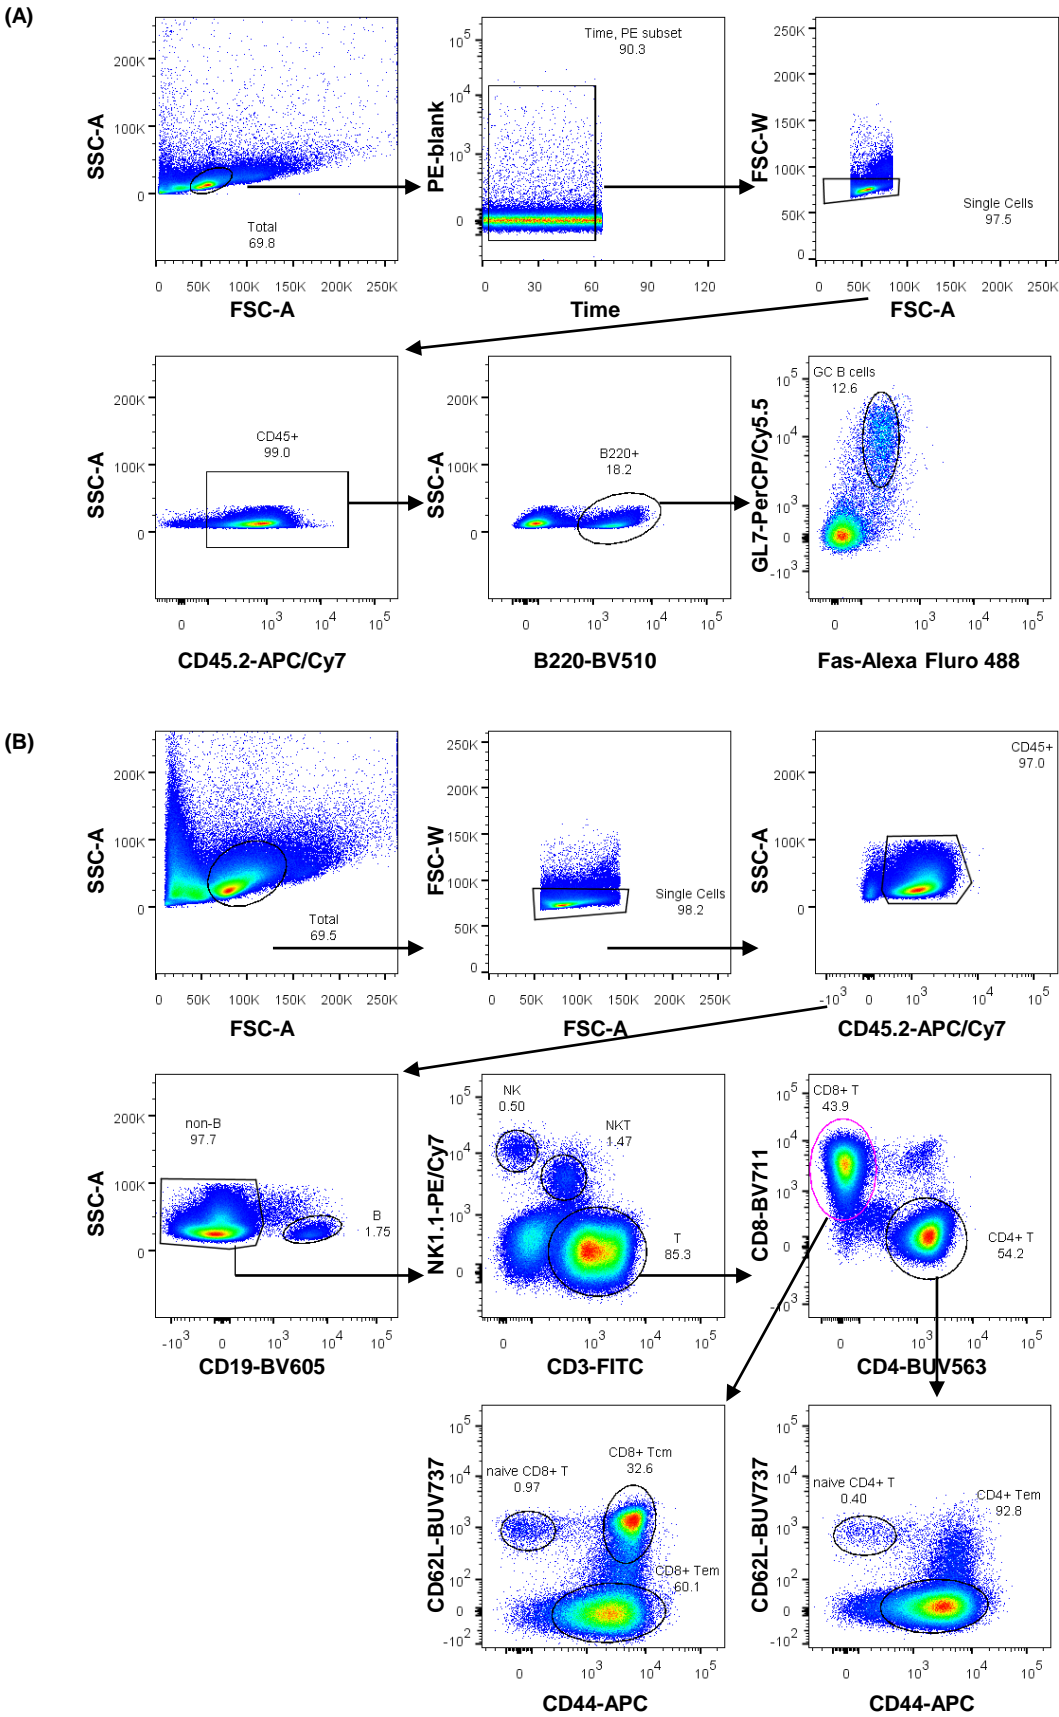

**Supplementary Figure 4. Flow cytometry gating strategy**  
**(A)** The full gating strategy of T cell subsets. **(B)** The full gating strategy of GC B cells.
